RESEARCH ARTICLE

# Lung function decline in subjects with and without COPD in a population-based cohort in Latin-America

Rogelio Pérez-Padilla<sup>1\*</sup>, Rosario Fernandez-Plata<sup>1</sup>, Maria Montes de Oca<sup>2</sup>, Maria Victorina Lopez-Varela<sup>3</sup>, Jose R. Jardim<sup>4</sup>, Adriana Muiño<sup>5</sup>, Gonzalo Valdivia<sup>5</sup>, Ana Maria B. Menezes<sup>6</sup>, On behalf of the PLATINO group<sup>†</sup>

**1** National Institute of Respiratory Diseases, Mexico City, Mexico, **2** Pulmonary Division, Hospital Universitario de Caracas, Universidad Central de Venezuela, Caracas, Venezuela, **3** University of the Republic, Faculty of Medicine, Montevideo, Uruguay, **4** School of Medicine, Federal University of Sao Paulo, Pelotas, Brazil, **5** Facultad de Medicina, Pontificia Universidad Católica de Chile, Santiago, Chile, **6** Post-graduate Program in Epidemiology, Federal University of Pelotas, Pelotas, Brazil

<sup>†</sup> Membership of the PLATINO group is provided in the Acknowledgments

\* [perezpad@gmail.com](mailto:perezpad@gmail.com)

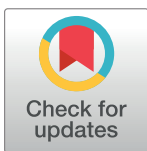

**OPEN ACCESS**

**Citation:** Pérez-Padilla R, Fernandez-Plata R, Montes de Oca M, Lopez-Varela MV, Jardim JR, Muiño A, et al. (2017) Lung function decline in subjects with and without COPD in a population-based cohort in Latin-America. PLoS ONE 12(5): e0177032. <https://doi.org/10.1371/journal.pone.0177032>

**Editor:** Sanjay Haresh Chotirmall, Lee Kong Chian School of Medicine, SINGAPORE

**Received:** January 8, 2017

**Accepted:** April 20, 2017

**Published:** May 4, 2017

**Copyright:** © 2017 Pérez-Padilla et al. This is an open access article distributed under the terms of the [Creative Commons Attribution License](https://creativecommons.org/licenses/by/4.0/), which permits unrestricted use, distribution, and reproduction in any medium, provided the original author and source are credited.

**Data Availability Statement:** Data are attached as a Supporting Information file.

**Funding:** This work was supported by the Asociación Latinoamericana de Tórax (ALAT), Boehringer Ingelheim GmbH, GlaxoSmithKline, and Novartis for the collection of the data during the field work. The funders had no role in study design, data collection and analysis, decision to publish, or preparation of the manuscript.

## Abstract

### Background

Lung-function decline is one of the possible mechanisms leading to Chronic Obstructive Pulmonary Disease (COPD).

### Methods

We analyzed data obtained from two population-based surveys of adults (n = 2026) conducted in the same individuals 5–9 years (y) after their baseline examination in three Latin-American cities. Post BronchoDilator (postBD) FEV<sub>1</sub> decline in mL/y, as %predicted/y (%P/y) and % of baseline/y (%B/y) was calculated and the influence of age, gender, BMI, baseline lung function, BD response, exacerbations rate evaluated using multivariate models.

### Results

Expressed in ml/y, the mean annual postBD FEV<sub>1</sub> decline was 27 mL (0.22%P, 1.32%B) in patients with baseline COPD and 36 (0.14%P, 1.36%B) in those without. Faster decline (in mL/y) was associated with higher baseline lung function, with significant response to bronchodilators, older age and smoking at baseline, also in women with chronic cough and phlegm, or ≥2 respiratory exacerbations in the previous year, and in men with asthma.

### Conclusions

Lung function decline in a population-based cohort did not differ in obstructed and non-obstructed individuals, it was proportional to baseline FEV<sub>1</sub>, and was higher in smokers, elderly, and women with respiratory symptoms.

**Competing interests:** The study was sponsored by ALAT, Boehringer, GSK, and Novartis. This does not alter our adherence to PLOS ONE policies on sharing data and materials, in a public repository.

## Introduction

Chronic Obstructive Pulmonary Diseases (COPD) is a leading cause of death worldwide. Classically, COPD has been considered a consequence of rapid lung-function decline during adult life, but more recently, it has also been considered as the consequence of poor lung development either before or after birth[1,2].

There is a great interest in identifying COPD subgroups, the so-called COPD phenotypes which are defined as “a single or a combination of disease attributes that describe differences between individuals with COPD as they relate to clinically meaningful outcomes (symptoms, exacerbations, response to therapy, rate of disease progression or death)” [3] In the (PLATINO) study population, we have described the main characteristics of several phenotypes associated with COPD[4–6]. Recently we reported longitudinal mortality rates according to COPD status and lung function measured at baseline in population-based samples of adults living in three Latin American cities, with follow-up periods ranging from 5–9 years (y) (the PLATINO follow-up study)[7]. To our knowledge, no information is available regarding lung-function decline in Latin America or its determinants in a population-based study; we aimed to assess the decline in the Forced Expiratory Volume in the first second (FEV<sub>1</sub>) in a large sample from Latin America with a high overall response rates and robust, well-established methods.

## Methods

The study protocol was approved by the Ethics Committee on Research, Pontifical Catholic University of Chile School of Medicine, by the Ethics Committee of the Maciel Hospital in Montevideo Uruguay, and by the Ethics Committee on Research of the Federal University of Sao Paulo/Sao Paulo Hospital. Study participants provided signed informed consent. The detailed methods of the PLATINO baseline[8] and follow-up studies[9] are available elsewhere. Between the years 2003 and 2005, population-based surveys were conducted, employing standardized methodology in five large Latin-American metropolitan areas: Sao Paulo (Brazil); Mexico City (Mexico); Montevideo (Uruguay); Santiago (Chile); and Caracas (Venezuela). We successfully interviewed 1,000 subjects aged 40 years or older in Sao Paulo, 1,063 in Mexico City, 943 in Montevideo, 1,208 in Santiago, and 1,357 in Caracas. Spirometry testing was performed for 963 (97.9%) subjects in Sao Paulo, 1,000 (98.3%) in Mexico City, 885 (97.1%) in Montevideo, 1,173 (99.8%) in Santiago, and 1,294 (98.4%) in Caracas[10]. The questionnaires (Spanish and Portuguese) are available at the PLATINO website: <http://www.platino-alat.org>.

Spirometry in the baseline and follow-up surveys was undertaken using an ultrasonic spirometer (EasyOne; ndd Medical Technologies, Zurich, Switzerland) prior to (pre- Broncho-Dilator [BD]) and 15 minutes after the administration of 200 µg of Salbutamol (post-BD) according to American Thoracic Society (ATS) criteria of acceptability and reproducibility [11], aiming for >90% test compliance with ATS quality criteria[8].

Follow-up studies were conducted in Montevideo, Santiago, and Sao Paulo 5, 6, and 9 years after the baseline surveys, respectively [9]. Individuals were visited at their homes based on the contact information provided by these persons during the baseline examination.

For the purposes of this work, we defined post-Bronchodilator (postBD) airflow obstruction Chronic Obstructive Pulmonary Disease [COPD] as individuals with a postBD FEV<sub>1</sub>/FVC below the Lower Limit of Normal (LLN)[12–14]—defined as the lower 5<sup>th</sup> percentile for predicted postBD FEV<sub>1</sub>/FVC based on equations derived from the 5 cities baseline study in a sub-set of healthy and never-smoker subjects[15]. We assessed, in survivors at the second evaluation, the annual decrease in spirometric lung function.

## Statistical analysis

The annual decline in FEV<sub>1</sub>, was estimated by subtracting the second measurement from the first, and subsequently dividing by the number of years (and fractions) between both measurements. The FEV<sub>1</sub> was analyzed in milliliters, but was also expressed as percentage of predicted (%P) for gender, age, and height[15], as percentage or baseline (%B), and as its natural logarithm[16] both for the preBD and postBD values.

The following potential confounders were explored in a multivariate analysis: age; gender; current smoking at baseline and at final evaluation (dichotomous and as cigarettes/day); lifetime cumulative smoking (pack-years); Body Mass Index BMI (kg/m<sup>2</sup>); years of academic education; self-reported comorbidities (heart disease, hypertension, diabetes, cerebrovascular accident and gastritis or ulcer, separately and as a count of positive comorbidities from 0–5); hour-years of exposure to biomass smoke (average number of years exposed by means of cooking multiplied by the average number of hours per day exposed); years of exposure in an occupation involving dust, smoke, or gases; the presence of chronic bronchitis (cough or phlegm on the majority of days, at least 3 months per year for >2 years, or cough and phlegm for the same time period) and previous Physician diagnosis of asthma or TB; significant response to bronchodilators (a postBD increase in FEV<sub>1</sub> or FVC of ≥12% and of ≥200mL)[17]; baseline spirometric measurement [15], and the presence of postBD airflow obstruction (COPD). Final multivariate models included all variables showing an association with decline, at a P < 0.15.

All statistical analyses were performed using Stata ver 13 statistical software (StataCorp, College Station, TX, USA) and we considered statistical significance as a P-value of < 0.05.

## Results

Only individuals with valid baseline spirometric data were eligible for follow-up. There were 885 eligible individuals for follow-up in Montevideo, 1173 in Santiago and 963 in Sao Paulo. Information was obtained for 758 (85.6%), 993 (84.7%) and 748 (77.7%) subjects, respectively. A total of 71 deaths in Montevideo, 95 in Santiago and 135 in Sao Paulo were identified. Among the individuals evaluated during follow-up, 2,120 had preBD and 2,026 postBD spirometry tests in both examinations. Follow-up rates for each independent-variable category were around 80% (see flowchart in [S1 Appendix](#)) [8,9].

Characteristics of the studied population in the first and second evaluations are depicted in [Table 1](#). Compared with the first examination, individuals in the follow-up exam were older, with less current smoking, and slightly lower lung function.

Decline in spirometric function was heterogeneous ([Fig 1](#)), and some individuals did not demonstrate any decline. We observed a second postBD measurement lower than the first, (negative change or decline) in 86% of participants for FEV<sub>1</sub> expressed in mL, in 58% if function is expressed as %P, and in 86% if expressed as %B. In 5.9% of participants, postBD FEV<sub>1</sub> increased >20 mL/y during the follow-up (5.6% in women, 6.3% in men, and 9.9% in those with postBD airflow obstruction).

In [Table 2](#), we describe the mean annual decline of FEV<sub>1</sub>, expressed in milliliters, as %P and as %B in women and men. Women declined, on average, for postBD FEV<sub>1</sub>, 31 mL/y (0.17%P/y, 1.33%B/y), whereas men declined on average for postBD FEV<sub>1</sub> 42 mL/y (0.29%P/y, 1.31%B/y). Decline in men was higher than in women in mL/y but was not statistically different if expressed as %P/y, as %B/y ([Table 2](#)), or as Δz scores, or as Δlog spirometric values (See Supplementary material, [S1–S5 Tables](#)). Decline of postBD measurements >40 mL/y, for FEV<sub>1</sub>, was observed in 34% of women, and in 48%, of men respectively. Similarly, the proportion of individuals with decline of postBD measurements >100 mL/y were higher in men: it was observed in 2.5%, of women, and in 8.5%, of men respectively. Variance of the lung function

**Table 1. Characteristics of the studied population in the first and second evaluation (means± standard deviation [SD]).**

| Variables                                                  | First evaluation | Second evaluation | P-value             |
|------------------------------------------------------------|------------------|-------------------|---------------------|
| Males, (% and 95%CI)                                       | 40.9 (39.6–42.3) | 40.5 (38.9–42.1)  | 0.76                |
| Age (years)                                                | 57.4±12.1        | 62.6±11.1         |                     |
| Height (cm)                                                | 160.0±9.7        | 159.8±9.8         | 0.99                |
| BMI (kg/m <sup>2</sup> )                                   | 28.1±5.7         | 28.8±5.2          | <0.001              |
| FEV <sub>1</sub> preBD (L)                                 | 2.56±0.80        | 2.41±0.77         | <0.001              |
| FVC preBD (L)                                              | 3.47±1.02        | 3.22±0.98         | <0.001              |
| FEV <sub>1</sub> postBD (L)                                | 2.67±0.80        | 2.50±0.77         | <0.001              |
| FVC postBD (L)                                             | 3.47±0.98        | 3.26±0.96         | <0.001              |
| FEV <sub>1</sub> /FVC preBD                                | 73.8±9.1         | 74.9±8.7          | <0.001              |
| FEV <sub>1</sub> /FVC postBD                               | 77.1±9.0         | 76.8±8.5          | 0.30                |
| Response to bronchodilators, % (95%CI)                     | 9.0 (7.9–10.1)   | 9.7 (8.4–11.0)    | 0.013               |
| History of asthma* (95%CI)                                 | 15.4 (14.2–16.8) | 15.6 (14.1–17.2)  | 0.86                |
| History of COPD* (95%CI)                                   | 4.6 (3.9–5.4)    | 6.3 (5.3–7.3)     | 0.01                |
| Current smoker (95%CI)                                     | 30.8 (29.1–32.4) | 24.3 (22.5–26.1)  | <0.001              |
| % exposed to biomass smoke for >6months % (95%CI)          | 46.2 (44.5–48.0) | 27.5 (26.0–29.1)  | <0.001              |
| Hour-years in those exposed to biomass smoke (median, IQR) | 20 (5, 48)       | 26 (10, 60)       | <0.001 <sup>‡</sup> |
| ≥2 exacerbations, last-year % (95%CI)                      | 2.6 (2.0–3.2)    | 3.3 (2.6–4.1)     | 0.03                |
| Previous tuberculosis, % (95%CI)                           | 3.4 (2.8–4.1)    | 2.9 (2.2–3.7)     | 0.29                |
| Job exposure to dust or smoke, %                           | 47.2 (45.5–49.0) | 34.0 (32.3–35.6)  | <0.001              |
| Chronic cough or phlegm %                                  | 14.5 (13.3–15.8) | 17.5 (15.4–18.9)  | 0.01                |
| Chronic cough and phlegm %(95%CI)                          | 4.2(3.5–4.9)     | 5.3(4.3–6.3)      | 0.11                |
| COPD (GOLD stages 1–4), % (95%CI)                          | 17.1 (15.7–18.5) | 17.4 (15.8–19.1)  | 0.76                |
| COPD (GOLD stages 2–4), % (95%CI)                          | 6.5 (5.6–7.4)    | 6.6 (5.6–7.7)     | 0.89                |
| COPD (FEV <sub>1</sub> /FVC<LLN), % (95%CI)                | 9.3 (8.3–10.4)   | 8.6 (7.4–9.9)     | 0.37                |

BMI (Body Mass Index) = weight/ height<sup>2</sup>; SD = Standard Deviation; preBD = before bronchodilator; postBD = after bronchodilator. 95%CI = 95% confidence interval; IQR = interquartile range; GOLD = Global Initiative for Chronic Obstructive Lung Disease. LLN = lower limit of normal; 95%CI = 95% confidence interval. Asthma-COPD overlap = medical diagnosis of asthma (first definition) plus FEV<sub>1</sub> /FVC<0.7 post-BD or wheezing in the last year plus response to bronchodilator plus FEV<sub>1</sub>/FVC<0.7 in the second definition. Bronchodilator response is the increase in FVC or FEV<sub>1</sub> of ≥12% and of ≥200mL. Chronic bronchitis was cough or phlegm on the majority of days for >3 months in 1 year for >2 consecutive years.

\*Self-reported previous physician diagnosis of the condition.

\*\*Student t tests on the equality of means

<sup>‡</sup>Mann-Whitney U tests, two independent samples. Individuals described are those with spirometric testing at baseline (column one) and follow up (column two, see [Methods](#)).

<https://doi.org/10.1371/journal.pone.0177032.t001>

decline (SD) in the population was significantly higher (P<0.001) for preBD measurements than for posBD measurements, and for men than for women ([Table 2](#)).

Main variables associated with lung function decline are presented in [Table 3](#) and [S1–S5](#) Tables. For postBD values of FEV<sub>1</sub> ([Table 3](#)), decline in men and women was significantly higher in individuals older at baseline, in those with higher baseline lung function, in those with significant response to bronchodilators, and was milder in those with greater height (once baseline lung function was taken into account) ([Table 3](#)). When expressed as %P or %B the impact of age was eliminated or reduced but not that of baseline lung function.

The presence of smoking at baseline or the number of cigarettes smoked, were associated with greater decline of FEV<sub>1</sub> in men and women. Having ≥2 respiratory disease exacerbations in the previous year, and chronic cough and phlegm was associated with higher decline in FEV<sub>1</sub> in women. Higher BMI predicted a reduced decline of FEV<sub>1</sub> ([Table 3](#)). The presence of a

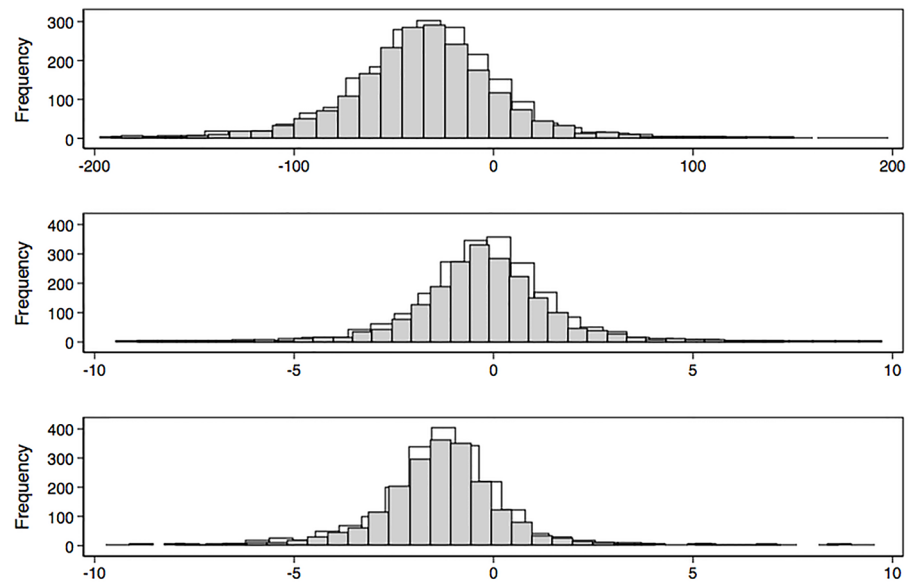

**Fig 1. Distribution of pre-bronchodilator (preBD) (gray bars) and post-bronchodilator (postBD) (light bars) Forced Expiratory Volume in the first second (FEV<sub>1</sub>) in mL/y (upper graph); as percentage of predicted (%P, middle graph); and as percentage of baseline (lower graph). Decline varied considerably regardless of in which units is expressed, including individuals with no decline or increase in measurements from baseline.**

<https://doi.org/10.1371/journal.pone.0177032.g001>

FEV<sub>1</sub>/FVC < LLN (COPD) was not associated with a significant increased decline (Tables 4 and 5), after taking baseline lung function into account.

The most consistent predictors of >100mL/y decline were the size of baseline function, age, response to bronchodilators, and in men smoking at baseline. Fifth percentiles of decline are also depicted in Table 2, and these were considerably higher (more negative) in men than in

**Table 2. Mean annual decline FEV<sub>1</sub> (SD), with 95% confidence intervals (95%CI) and 5th percentiles (P5).**

| Variables                     | Women                 |                            |                    |                        | Men                   |                            |                    |                        |
|-------------------------------|-----------------------|----------------------------|--------------------|------------------------|-----------------------|----------------------------|--------------------|------------------------|
|                               | Mean annual drop (SD) | 95%CI, Mean annual decline | 5th percentile all | 5th percentile healthy | Mean annual drop (SD) | 95%CI, Mean annual decline | 5th percentile all | 5th percentile healthy |
| preBD FEV <sub>1</sub> (mL/y) | -29.3 (39.6)          | -31.4, -27.1               | -88                | -100                   | -40.5 (49.1)          | -43.8, -37.2               | -125               | -149                   |
| posBD FEV <sub>1</sub> (mL/y) | -31.4 (34.8)          | -33.5, -29.3               | -81                | -91                    | -41.7 (47.7)          | -44.9, -38.4               | -121               | -126                   |
| preBD FEV <sub>1</sub> (%P/y) | -0.14 (1.9)           | -0.24, -0.04               | -2.9               | -3.6                   | -0.30 (1.7)           | -0.41, -0.18               | -3.2               | -4.2                   |
| posBD FEV <sub>1</sub> (%P/y) | -0.17 (1.7)           | -0.27, -0.06               | -2.7               | -3.1                   | -0.29 (1.7)           | -0.40, -0.18               | -3.1               | -3.7                   |
| preBD FEV <sub>1</sub> (%B/y) | -1.25 (2.39)          | -1.38, -1.12               | -4.12              | -4.92                  | -1.28 (2.0)           | -1.41, -1.15               | -4.31              | -4.70                  |
| PosBD FEV <sub>1</sub> (%B/y) | -1.33 (1.61)          | -1.43, -1.24               | -3.79              | -3.91                  | -1.31 (1.6)           | -1.42, -1.20               | -4.07              | -4.60                  |

%P = expressed as percentage of predicted according to PLATINO reference values. %B = expressed as percentage of baseline. 95%CI = 95% confidence interval of the mean. PreBD = pre bronchodilator test; posBD = post bronchodilator test; SD = standard deviation of the sample. 5th percentile value of the whole cohort (all, 1261 women and 858 men with preBD testing, 1203 and 822 with postBD testing) or from the respiratory healthy (207 women and 104 men with preBD testing and 195, 97 with postBD testing). See the supplemental material for declines of zFEV<sub>1</sub>, FEV<sub>1</sub>/Height<sup>3</sup> and LogFEV<sub>1</sub>

<https://doi.org/10.1371/journal.pone.0177032.t002>

**Table 3. Multivariate regression coefficients (with 95% confidence intervals) for associations with the post bronchodilator Forced Expiratory Volume at one second (FEV<sub>1</sub>, mL/y) decline in the cohort.**

| Variables                             | Women                 |                |                       |                | Men                   |                |                       |               |
|---------------------------------------|-----------------------|----------------|-----------------------|----------------|-----------------------|----------------|-----------------------|---------------|
|                                       | FEV <sub>1</sub> (mL) | 95%CI          | FEV <sub>1</sub> (%P) | 95%CI          | FEV <sub>1</sub> (mL) | 95%CI          | FEV <sub>1</sub> (%P) | 95%CI         |
| Baseline PostBD FEV <sub>1</sub> (mL) | -0.025                | -0.031, -0.021 | -0.001                | -0.001, -0.001 | -0.014                | -0.020, -0.007 |                       |               |
| Age (years)                           | -0.58                 | -0.80, -0.36   |                       |                | -0.613                | -0.988, -0.238 |                       |               |
| Height (cm)                           | 0.65                  | 0.32, 0.98     | 0.0352                | 0.0185, 0.0519 | 0.594                 | 0.068, 1.119   | 0.013*                | -0.0003, 0.03 |
| BMI (kg/m <sup>2</sup> )              | 0.25*                 | -0.05, 0.54    |                       |                | 1.140                 | 0.367, 1.914   | 0.042                 | 0.01, 0.06    |
| Cigarettes/day                        | -0.71                 | -1.0, -0.4     | -0.0295               | -0.044, -0.015 |                       |                |                       |               |
| Smoking at baseline (yes/no)          |                       |                |                       |                | -11.85                | -18.89, -4.80  | -0.33                 | -0.57, -0.09  |
| TB                                    |                       |                | -0.661                | -1.18, -0.138  |                       |                |                       |               |
| >2 exacerbations last year            | -14.8                 | -24.2, -5.2    | -0.559                | -1.045, -0.072 |                       |                |                       |               |
| Chronic cough & phlegm                | -11.7                 | -20.8, -2.6    | -0.642                | -1.11, -0.178  |                       |                |                       |               |
| Response to BD                        | -11.9                 | -18.6, -5.2    | -0.617                | -0.961, -0.274 | -25.160               | -39.40, -10.92 | -0.68                 | -1.17, -0.19  |

95%CI = 95% confidence interval of the mean. PreBD = pre bronchodilator test; posBD = post bronchodilator test; %P = expressed as percentage of predicted according to PLATINO reference values. Variability explained by the model (adjusted R<sup>2</sup>) was 9% in women, and 4.9% in men. Bronchodilator response is the increase in FVC or FEV<sub>1</sub> of ≥12% and of ≥200mL. Chronic cough and phlegm was cough or phlegm on the majority of days for >3 months in a year for >2 consecutive years. The presence of postBD airflow obstruction (COPD) was not associated with decline in multivariate models.

TB = previous tuberculosis. Total number of individuals in the models is 2,120 for preBD and 2,026 for postBD tests.

\*All variables included in the models had a P<0.15, but some of the variables in the table did not reach the statistical significance at p<0.05.

<https://doi.org/10.1371/journal.pone.0177032.t003>

women, and higher than -40 mL/y. Table 2 includes the 5th percentile of the whole cohort, and the 5th percentile of a "respiratory healthy" group[15], comprised of never smoker individuals, lacking respiratory symptoms and previous diagnosis of respiratory diseases, demonstrating slightly more negative values than in the whole cohort.

Only about 6–11% of the variability of decline in women and 2–6% in men was explained by the statistical models.

## Discussion

Annual lung-function decline, one of the mechanisms leading to COPD, was estimated for a population-based cohort in three cities of Latin America. Decline was heterogeneous as previously reported in patients with COPD[18] but did not differ significantly in obstructed and non-obstructed individuals. In women, the presence of chronic bronchitis and frequent respiratory exacerbations also was associated with faster decline. As found in other longitudinal studies PostBD lung function declined faster (in mL/y) in men than in women, in individuals recruited at older age, in those with higher lung function at baseline, in current smokers, and in those with significant response to bronchodilators. A higher decline in mL/y in men and in those with higher lung function suggests that the decline is proportional to lung size[16], and models fitted to estimate loss as %P, or as %B, reduce the association of decline with baseline function. Expressing declines in mL/y may be deceiving as these tend to decrease with airflow obstruction, old age, women, and in individuals with small size, but if expressed as proportional changes, the declines may, in fact, increase[16].

We also estimated 5th percentiles of decline in the general population as it may be important for COPD risk and prevention, in that it could comprise a marker of a statistically significant and uncommon decline in the population. Fortunately, 5th percentiles of declines expressed as %P are more consistent around 3%/y, and those expressed as %B around 4%, which can be used to advantage. In our study, all declines expressed as %P, or as z-scores were statistically significant (lower than zero) meaning that the cross-sectional age-coefficient

**Table 4. Characteristics of subjects with and without Chronic Obstructive Pulmonary Disease (COPD, post-BD FEV<sub>1</sub>/FVC<LLN, mean±standard deviation [SD]) or 95% confidence interval (95%CI) in the whole cohort at baseline.**

| Variables                                             | NO COPD (N = 2875) | SD (or 95%CI) | COPD (N = 146) | SD (or 95%CI) | P-value* |
|-------------------------------------------------------|--------------------|---------------|----------------|---------------|----------|
| Males, % (95%CI)                                      | 40.6               | 39.1–41.9     | 48.6           | 39.8–57.5     | 0.06     |
| Age (years)                                           | 56.8               | 11.8          | 63.1           | 13.1          | <0.001   |
| Height (cm)                                           | 160.1              | 9.7           | 159.4          | 10.3          | 0.43     |
| BMI (kg/m <sup>2</sup> )                              | 28.1               | 5.7           | 27.9           | 5.6           | 0.75     |
| FEV <sub>1</sub> preBD (L)                            | 2.60               | 0.78          | 1.79           | 0.76          | <0.001   |
| FVC preBD (L)                                         | 3.49               | 1.01          | 3.09           | 1.11          | <0.001   |
| FEV <sub>1</sub> postBD (L)                           | 2.71               | 0.78          | 1.93           | 0.76          | <0.001   |
| FVC postBD (L)                                        | 3.48               | 0.97          | 3.32           | 1.15          | <0.001   |
| FEV <sub>1</sub> /FVC preBD                           | 74.7               | 8.1           | 57.3           | 11.5          | <0.001   |
| FEV <sub>1</sub> /FVC postBD                          | 78.1               | 7.7           | 57.5           | 9.4           | <0.001   |
| Deaths (95%CI)                                        | 9.1                | 7.9–11.5      | 18.5           | 11.5–25.5     | 0.001    |
| Bronchodilator response, % (95%CI)                    | 7.4                | 6.4–8.4       | 39.7           | 32.0–47.5     | <0.001   |
| History of asthma, % (95%CI)                          | 14.3               | 13.0–15.7     | 38.4           | 30.4–46.3     | <0.001   |
| History of COPD, % (95%CI)                            | 4.0                | 3.2–4.7       | 17.8           | 11.1–24.5     | <0.001   |
| Current smoker, % (95%CI)                             | 32.9               | 30.8–35.0     | 0.000          | 0.000         | <0.001   |
| % exposed to biomass smoke of >6months                | 54.2               | 51.8–56.5     | 64.4           | 56.7–72.1     | 0.02     |
| Biomass exposure, (hour-years in exposed) median, IQR | 18.6               | 43.8          | 36.3           | 95.5          | <0.001   |
| ≥1 exacerbations last year, % (95%CI)                 | 2.4                | 1.8–3.1       | 8.2            | 3.8–12.6      | <0.001   |
| ≥2 exacerbations last year, % (95%CI)                 | 3.1                | 2.4–3.8       | 7.4            | 1.4–13.4      | 0.04     |
| Chronic cough or phlegm, % (95%CI)                    | 14.2               | 12.9–15.4     | 22.6           | 15.6–29.6     | 0.01     |
| Chronic cough and phlegm, (95%CI)                     | 4.1                | 3.4–4.8       | 8.9            | 4.2–13.6      | 0.01     |
| Previous tuberculosis, % (95%CI)                      | 3.1                | 2.5–3.8       | 10.3           | 5.7–14.9      | <0.001   |
| Job exposure to dust or smoke, %                      | 47.5               | 45.4–49.7     | 58.2           | 50.4–66.1     | 0.01     |

preBD = before bronchodilator use; postBD = after bronchodilator use; COPD is a postBD FEV<sub>1</sub>/FVC<lower limit of normal according to the PLATINO reference values.

\*TTest for independent groups or Fisher exact test for categorical variables; Bronchodilator response is the increase in FVC or FEV<sub>1</sub> ≥12% & ≥200mL. Chronic cough or phlegm on the majority of days for >3 months during a year for >2 years

<https://doi.org/10.1371/journal.pone.0177032.t004>

obtained from the baseline spirometry in healthy individuals[15] differs from the longitudinal age-decline.

A reduced postBD FEV<sub>1</sub>/FVC (COPD) was not associated with excessive decline if models were adjusted by baseline function, emphasizing the relevance of FEV<sub>1</sub>, rather than that of the FEV<sub>1</sub>/FVC ratio as predictors of decline, but also of mortality[7].

Individuals with previous physician diagnosis of TB, were associated with airflow obstruction and reduced baseline function in the PLATINO study[19], but they did not have a steeper lung-function decline consistently (see Online Supplementary Material). Data of South African miners exposed to silica and tuberculosis (TB), indicated that lung-function decline was proportional to the number of TB episodes[20]. However this may be different in the absence of significant exposure to silica in general population.

Similarly, individuals reporting exposure to biomass smoke or to dust at work were not more likely to have an increased rate of lung-function decline. Recently, a heterogeneous lung-function decline in a cohort of individuals with biomass smoke-associated COPD was reported[21], similar to that observed in other COPD cohorts associated with smoking[22]. In fact, only a small proportion of patients demonstrated a measurable decline.

**Table 5. Lung function (FEV<sub>1</sub>) decline in participants with and without airflow obstruction (postBD FEV<sub>1</sub>/FVC<LLN), means and standard deviation (SD) or 95%CI.**

| Variables                                           | NO COPD (N = 2,025) | SD (or 95%CI) | COPD (N = 95) | SD (or 95%CI) | P-value* |
|-----------------------------------------------------|---------------------|---------------|---------------|---------------|----------|
| Mean decline PreBD (mL/year)                        | -34.2               | 43.8          | -26.1         | 48.9          | 0.08     |
| Mean decline PostBD (mL/y)                          | -35.9               | 40.7          | -26.8         | 41.3          | 0.04     |
| Mean decline PreBD (%P/year)                        | -0.21               | 1.8           | -0.17         | 2.1           | 0.90     |
| Mean decline PostBD (%P/year)                       | -0.22               | 1.6           | -0.14         | 2.0           | 0.60     |
| Mean decline PreBD (%B/year)                        | -1.26               | 2.2           | -1.30         | 2.8           | 0.90     |
| Mean decline PostBD (%B/year),                      | -1.32               | 1.5           | -1.36         | 2.1           | 0.80     |
| % with >20 mL/y increase in preBD FEV <sub>1</sub>  | 5.9                 | 4.9–7.0       | 7.4           | 2.0–12.7      | 0.56     |
| % with >20 mL/y increase in postBD FEV <sub>1</sub> | 5.7                 | 4.7–6.7       | 9.9           | 3.6–16.1      | 0.10     |
| % with any preBD FEV <sub>1</sub> decline           | 84.5                | 82.8–86.2     | 77.9          | 69.6–86.2     | 0.08     |
| % with any postBD FEV <sub>1</sub> decline          | 86.0                | 84.5–87.5     | 80.2          | 72.4–88.0     | 0.12     |
| % with any preBD decline as %P                      | 55.8                | 53.4–58.2     | 54.7          | 44.7–64.8     | 0.84     |
| % with any postBD decline as %P                     | 57.7                | 55.5–59.9     | 57.1          | 46.8–67.5     | 0.91     |
| % with >40mL/y decline                              | 41.0                | 38.7–43.3     | 32.6          | 23.1–42.2     | 0.11     |
| % with >40mL/y postBD                               | 42.7                | 40.4–45.1     | 38.5          | 28.6–48.3     | 0.4      |
| % with preBD decline >3%P/y                         | 4.9                 | 4.0–5.9       | 8.4           | 2.7–14.1      | 0.13     |
| % with postBD decline >3%P/y                        | 4.3                 | 3.4–5.2       | 3.2           | 0.0–6.7       | 0.59     |
| % with preBD decline >4%B/y                         | 5.5                 | 4.5–6.5       | 16.8          | 9.2–24.5      | <0.001   |
| % with postBD decline >4%B/y                        | 4.1                 | 3.2–5.0       | 7.4           | 2.0–12.7      | 0.13     |

preBD = before bronchodilator use; postBD = after bronchodilator use; COPD is a postBD FEV<sub>1</sub>/FVC<lower limit of normal according to the PLATINO reference values.

\*T test for independent groups or Fisher exact test for categorical variables; %P = FEV<sub>1</sub> expressed as percentage of predicted by the PLATINO reference values; %B = FEV<sub>1</sub> expressed as percentage of baseline or first measurement; Results based on 2,120 individuals with two preBD spirometric tests, or 2,026 individuals with two postBD spirometry tests.

<https://doi.org/10.1371/journal.pone.0177032.t005>

In our study using multivariate models, individuals with a prior Physician diagnosis of asthma had significantly lower baseline FEV<sub>1</sub> preBD, and postBD (-172 mL and -156 mL, respectively), but FEV<sub>1</sub> declined similarly than the remaining of the cohort, in contrast with a steeper lung-function decline observed previously in asthmatics if the disease initiates in infancy, or is poorly controlled, or if the individual smokes[23].

Adult airflow obstruction may begin early in life, through poor lung development (small lungs), but also, as proposed years ago, individuals with normal -sized lungs may exhibit accelerated lung function-decline and develop obstruction[2]. Contrary to the traditional view, accelerated FEV<sub>1</sub> decline in individuals with COPD is uncommon[22] and, in advanced COPD stages, decline in mL/y is reduced[24], although if expressed in relative terms, decline may increase[16] reinforcing the presence of a decline proportional to lung size or function and the convenience of expressing it as %B or %P.

In our study, mean FEV<sub>1</sub> decline in COPD fell within the observed ranges in cohorts of patients with COPD[24], but, in addition the rates did not differ significantly from those of individuals without airflow obstruction, a comparison unavailable in data proceeding from cohorts of patients.

There are study limitations that should be mentioned: follow-up includes only three of the original five cities, with only two spirometric evaluations, limiting the accurate assessment of the annual individual FEV<sub>1</sub> decline and possibly the identification of “fast decliners”[25]. In addition, participants from Mexico, likely with a higher Amerindian contribution, had a lower



prevalence of COPD, although rates of decline in a cohort of Mexican patients coincide with those of the current report [21].

It is noteworthy that lung-function decline is highly variable even after several spirometric measurements[18] and also, that relevant information on lung-function decline has been produced based only on two measurements[26,27]. Although we performed only two spirometric tests, both were carried out with the same equipment, both included postBD measurements, and the test quality was good[15], with a population-based sample size sufficient for finding statistically significant and clinically relevant associations and high rates of follow-up after 5–9 years. Differently from studies based on cohorts of patients with COPD, our statistical models compared not only individuals with airflow obstruction due to their smoking experience, but also with non-obstructed individuals from general population. We reported mostly postBD spirometric measurements, which were also less variable in our data than those obtained prior to BD, and which represented maximal lung function at the testing time.

Smoking is the principal recognized cause of COPD, was a relevant risk for lung-function loss at baseline, and for lung-function decline (Table 4). Another priority comprises the diagnosis and control of asthma, a known cause of airflow obstruction and a relevant risk for exacerbations and lung function loss, and with effective interventions such as the use of inhaled corticosteroids.

In conclusion, obstructed and non-obstructed individuals had a similar lung-function decline in a population-based study from three Latin-American cities. Women with chronic cough and phlegm or with frequent respiratory exacerbations declined faster in FEV<sub>1</sub>. Anti-tobacco campaigns are the most important public health measure to prevent COPD. In addition, lung function decline should take into account baseline lung function and age, and expressing it as %P or %baseline entertains advantages over its customary expression as mL/y.

## Supporting information

**S1 Appendix. Flowchart describing the participants in the first and final examination of PLATINO study, and lost to follow-up.**

(DOCX)

**S1 Table. Multivariate regression coefficients (with 95% confidence intervals) for associations with the post bronchodilator log-Forced Expiratory Volume at one-second (logFEV<sub>1</sub>, logmL) decline in the cohort.**

(DOCX)

**S2 Table. Multivariate regression coefficients (with 95% confidence intervals) for associations with the post bronchodilator Forced Expiratory Volume at one second (FEV<sub>1</sub>, %) decline in the cohort expressed as percentage of baseline.**

(DOCX)

**S3 Table. Multivariate regression coefficients (with 95% confidence intervals) for associations with the post bronchodilator Forced Expiratory Volume at one-second (zFEV<sub>1</sub>) decline in the cohort expressed as Z score.**

(DOCX)

**S4 Table. Multivariate regression coefficients (with 95% confidence intervals) for associations with the post bronchodilator Forced Expiratory Volume at one-second (FEV<sub>1</sub>/height<sup>3</sup>) decline in the cohort.**

(DOCX)

**S5 Table. Mean annual decline of FEV<sub>1</sub> (logFEV<sub>1</sub>, zFEV<sub>1</sub>, FEV<sub>1</sub>/Height<sup>3</sup>) in individuals with and without airflow obstruction.**  
(DOCX)

## Acknowledgments

Rogelio Perez-Padilla is the guarantor of the content of the manuscript, including the data and analysis.

Marina<sup>1</sup>, Dolores Moreno<sup>3</sup>, Carmen Lisboa<sup>5</sup>, Julio Pertuze<sup>5</sup> Oliver A. Nascimento<sup>6</sup>, Fernando Wehrmeister, Mariana R. Gazzotti<sup>6</sup>, Graciane Laender<sup>6</sup> and Beatriz Manzano<sup>6</sup>

## Author Contributions

**Conceptualization:** AMM RPP.

**Data curation:** AMM RFP RPP.

**Formal analysis:** RFP RPP.

**Funding acquisition:** AMM MLV JRJ GV.

**Investigation:** AMM MLV JRJ GV MMO RPP.

**Methodology:** AMM RPP RFP.

**Project administration:** AMM MVL GV JRJ AM MMO.

**Resources:** AMM MVL GV JRJ AM.

**Supervision:** AMM RPP MMO GV JRJ MLV AM.

**Writing – original draft:** RPP RFP AMM.

**Writing – review & editing:** RPP AMM RFP JRJ GV MMO AM MLV.

## References

1. Postma DS, Bush A, van den Berge M (2015) Risk factors and early origins of chronic obstructive pulmonary disease. *Lancet* 385: 899–909. [https://doi.org/10.1016/S0140-6736\(14\)60446-3](https://doi.org/10.1016/S0140-6736(14)60446-3) PMID: 25123778
2. Lange P, Celli B, Agusti A, Boje Jensen G, Divo M, Faner R, et al. (2015) Lung-Function Trajectories Leading to Chronic Obstructive Pulmonary Disease. *N Engl J Med* 373: 111–122. <https://doi.org/10.1056/NEJMoa1411532> PMID: 26154786
3. Han MK, Agusti A, Calverley PM, Celli BR, Criner G, Curtis JL, et al. (2010) Chronic obstructive pulmonary disease phenotypes: the future of COPD. *Am J Respir Crit Care Med* 182: 598–604. <https://doi.org/10.1164/rccm.200912-1843CC> PMID: 20522794
4. Montes de Oca M, Halbert RJ, Lopez MV, Perez-Padilla R, Talamo C, Moreno D, et al. (2012) Chronic bronchitis phenotype in subjects with and without COPD: the PLATINO study. *Eur Respir J* 40: 28–36. <https://doi.org/10.1183/09031936.00141611> PMID: 22282547
5. Menezes AM, Montes de Oca M, Perez-Padilla R, Nadeau G, Wehrmeister FC, Lopez-Varela MV, et al. (2014) Increased risk of exacerbation and hospitalization in subjects with an overlap phenotype: COPD-asthma. *Chest* 145: 297–304. <https://doi.org/10.1378/chest.13-0622> PMID: 24114498
6. Perez-Padilla R, Fernandez R, Lopez Varela MV, Montes de Oca M, Muiño A, Talamo C, et al. (2012) Airflow Obstruction in Never Smokers in Five Latin American Cities: The PLATINO Study. *Archives of Medical Research* 43: 159–165. <https://doi.org/10.1016/j.arcmed.2012.03.007> PMID: 22475778
7. Menezes AM, Perez-Padilla R, Wehrmeister FC, Lopez-Varela MV, Muino A, Valdivia G, et al. (2014) FEV1 is a better predictor of mortality than FVC: the PLATINO cohort study. *PLoS One* 9: e109732. <https://doi.org/10.1371/journal.pone.0109732> PMID: 25285441

8. Menezes AM, Victora CG, Perez-Padilla R (2004) The Platino project: methodology of a multicenter prevalence survey of chronic obstructive pulmonary disease in major Latin American cities. *BMC Med Res Methodol* 4: 15. <https://doi.org/10.1186/1471-2288-4-15> PMID: 15202950
9. Menezes AM, Muino A, Lopez-Varela MV, Valdivia G, Lisboa C, Jardim JR, et al. (2014) A population-based cohort study on chronic obstructive pulmonary disease in Latin America: methods and preliminary results. *The PLATINO Study Phase II. Arch Bronconeumol* 50: 10–17. <https://doi.org/10.1016/j.arbres.2013.07.014> PMID: 24332830
10. Menezes AM, Perez-Padilla R, Jardim JR, Muino A, Lopez MV, Valdivia G, et al. (2005) Chronic obstructive pulmonary disease in five Latin American cities (the PLATINO study): a prevalence study. *Lancet* 366: 1875–1881. [https://doi.org/10.1016/S0140-6736\(05\)67632-5](https://doi.org/10.1016/S0140-6736(05)67632-5) PMID: 16310554
11. American Thoracic Society (1995) Standardization of Spirometry, 1994 Update. *Am J Respir Crit Care Med* 152: 1107–1136. <https://doi.org/10.1164/ajrccm.152.3.7663792> PMID: 7663792
12. Hardie JA, Buist AS, Vollmer WM, Ellingsen I, Bakke PS, Morkve O (2002) Risk of over-diagnosis of COPD in asymptomatic elderly never-smokers. *Eur Respir J* 20: 1117–1122. PMID: 12449163
13. Perez-Padilla R, Hallal PC, Vazquez-Garcia JC, Muino A, Maquez M, Lopez MV, et al. (2007) Impact of bronchodilator use on the prevalence of COPD in population-based samples. *COPD* 4: 113–120. <https://doi.org/10.1080/15412550701341012> PMID: 17530504
14. Vollmer WM, Gislason T, Burney P, Enright PL, Gulsvik A, Kocabas A, et al. (2009) Comparison of spirometry criteria for the diagnosis of COPD: results from the BOLD study. *Eur Respir J* 34: 588–597. <https://doi.org/10.1183/09031936.00164608> PMID: 19460786
15. Pérez-Padilla R, Valdivia G, Muíño A, López MV, Márquez MN, Montes de Oca M, et al. (2006) Spirometric reference values in 5 large Latin American cities for subjects aged 40 years or over. *Archivos de Bronconeumología (English Edition)* 42: 317–325.
16. Thomsen LH, Dirksen A, Shaker SB, Skovgaard LT, Dahlback M, Pedersen JH (2014) Analysis of FEV1 decline in relatively healthy heavy smokers: implications of expressing changes in FEV1 in relative terms. *COPD* 11: 96–104. <https://doi.org/10.3109/15412555.2013.830096> PMID: 24111638
17. Pellegrino R, Viegi G, Brusasco V, Crapo RO, Burgos F, Casaburi R, et al. (2005) Interpretative strategies for lung function tests. *Eur Respir J* 26: 948–968. <https://doi.org/10.1183/09031936.05.00035205> PMID: 16264058
18. Vestbo J, Edwards LD, Scanlon PD, Yates JC, Agusti A, Bakke P, et al. (2011) Changes in forced expiratory volume in 1 second over time in COPD. *N Engl J Med* 365: 1184–1192. <https://doi.org/10.1056/NEJMoa1105482> PMID: 21991892
19. Allwood BW, Myer L, Bateman ED (2013) A systematic review of the association between pulmonary tuberculosis and the development of chronic airflow obstruction in adults. *Respiration* 86: 76–85. <https://doi.org/10.1159/000350917> PMID: 23652030
20. Hnizdo E, Singh T, Churchyard G (2000) Chronic pulmonary function impairment caused by initial and recurrent pulmonary tuberculosis following treatment. *Thorax* 55: 32–38. <https://doi.org/10.1136/thorax.55.1.32> PMID: 10607799
21. Ramirez-Venegas A, Sansores RH, Quintana-Carrillo RH, Velazquez-Uncal M, Hernandez-Zenteno RJ, Sanchez-Romero C, et al. (2014) FEV1 decline in patients with chronic obstructive pulmonary disease associated with biomass exposure. *Am J Respir Crit Care Med* 190: 996–1002. <https://doi.org/10.1164/rccm.201404-0720OC> PMID: 25172140
22. Casanova C, de Torres JP, Aguirre-Jaime A, Pinto-Plata V, Marin JM, Cordoba E, et al. (2011) The progression of chronic obstructive pulmonary disease is heterogeneous: the experience of the BODE cohort. *Am J Respir Crit Care Med* 184: 1015–1021. <https://doi.org/10.1164/rccm.201105-0831OC> PMID: 21836135
23. Grol MH, Gerritsen J, Vonk JM, Schouten JP, Koeter GH, Rijcken B, et al. (1999) Risk factors for growth and decline of lung function in asthmatic individuals up to age 42 years. A 30-year follow-up study. *Am J Respir Crit Care Med* 160: 1830–1837. <https://doi.org/10.1164/ajrccm.160.6.9812100> PMID: 10588593
24. Tantucci C, Modena D (2012) Lung function decline in COPD. *Int J Chron Obstruct Pulmon Dis* 7: 95–99. <https://doi.org/10.2147/COPD.S27480> PMID: 22371650
25. Ferguson GT, Enright PL, Buist AS, Higgins MW (2000) Office spirometry for lung health assessment in adults: A consensus statement from the National Lung Health Education Program. *Chest* 117: 1146–1161. PMID: 10767253
26. Vestbo J, Prescott E, Lange P (1996) Association of chronic mucus hypersecretion with FEV1 decline and chronic obstructive pulmonary disease morbidity. Copenhagen City Heart Study Group.

Am J Respir Crit Care Med 153: 1530–1535. <https://doi.org/10.1164/ajrccm.153.5.8630597> PMID: 8630597

27. Skloot GS, Schechter CB, Herbert R, Moline JM, Levin SM, Crowley LE, et al. (2009) Longitudinal assessment of spirometry in the World Trade Center medical monitoring program. *Chest* 135: 492–498. <https://doi.org/10.1378/chest.08-1391> PMID: 19141527
